# Supplementary material for: Heterologous ChAdOx1 nCoV-19/BNT162b2 Prime-Boost Vaccination Induces Strong Humoral Responses among Health Care Workers
Source: Vaccines (Basel). 2021 Aug 4;9(8):857. doi: 10.3390/vaccines9080857 (PMC8402499; doi:10.3390/vaccines9080857)
Supplement: Supplementary file 1 [file vaccines-09-00857-s001.zip › vaccines-1289519-supplementary.pdf]

**Table S1.** Cutoff values of the SARS-CoV-2 specific bead-based multiplex assay.

| Target                          | Cutoff (MFI) |
|---------------------------------|--------------|
| SARS-CoV-2 Full Spike           | 6800         |
| SARS-CoV-2 Spike S1             | 2700         |
| SARS-CoV-2 Spike RBD            | 3800         |
| SARS-CoV-2 Spike S2             | 3200         |
| SARS-CoV-2 Nucleocapsid Protein | 5900         |
| HCoV-229E Spike S1              | 8012         |
| HCoV-HKU1 Spike S1              | 4235         |
| HCoV-NL63 Spike S1              | 4407         |
| HCoV-OC43 Spike S1              | 3599         |
| MERS-CoV Spike S1               | 21           |
| SARS-CoV-1 Spike S1             | 41           |

SARS, severe acute respiratory syndrome; MERS, middle east acute respiratory syndrome; MFI, mean fluorescence intensity

**Table S2.** Participants Baseline Characteristics for analysis against different SARS-CoV-2 target antigens.

|                   | AZ/BNT Heterol Boost | BNT/BNT Homol Boost | P-value |
|-------------------|----------------------|---------------------|---------|
| N                 | 15                   | 15                  |         |
| Age, median (IQR) | 33 (27 – 39)         | 42 (30 – 56)        | 0.07    |
| Female, N (%)     | 7 (47)               | 7 (47)              | >0.99   |

AZ=AstraZeneca; BNT=BioNTech, N=number

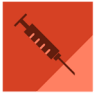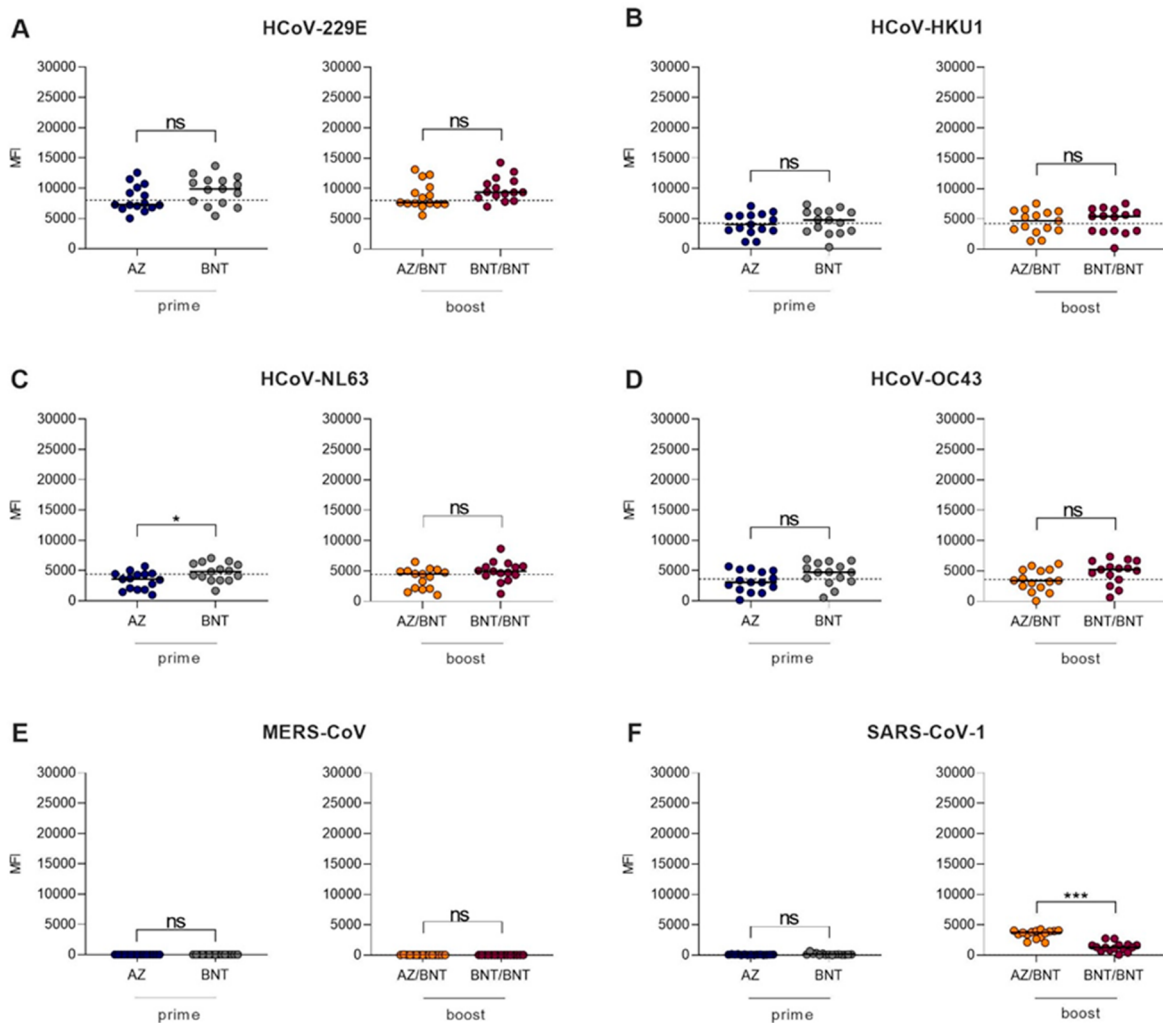

**Figure S1.** Antibodies against the S1 spike protein of the 4 community coronaviruses, MERS-CoV, and SARS-CoV-1 after AZ and BNT prime vaccination and after AZ/BNT heterologous and BNT/BNT homologous boost vaccination. IgG antibodies against the 4 community coronaviruses, MERS-CoV, and SARS-CoV-1 in health care workers after AZ and BNT prime vaccination and after AZ/BNT heterologous and BNT/BNT homologous boost vaccination. Detection of antibodies against HCoV-229E (A), HCoV-HKU1 (B), HCoV-NL63 (C), HCoV-OC43 (D), MERS-CoV (E), and SARS-CoV-1 (F) in health care workers after AZ and BNT prime vaccination and after AZ/BNT heterologous and BNT/BNT homologous boost vaccination. The x-axis represents the vaccination pattern, and the y-axis the mean fluorescence intensity (MFI) value of the reactivity. The dashed black line represents the cutoff for detection for each target, respectively.

### Calculation of inhibition via optical density

Optical density at 450 nm was measured in each well and the percent (%) inhibition was calculated as follows:

$$\text{Inhibition} = \left( 1 - \left( \frac{\text{OD value of Sample}}{\text{OD value of Negative Control}} \right) \right) \times 100\%$$

### Side effects questionnaire

**1. Side effects after 1st vaccination:**

- ☐ yes ☐ no

**2. If yes, please mark the appropriate side effects you had:**

- ☐ local events (such as pain at injection site, redness, swelling)  
☐ fever ☐ fatigue ☐ headache ☐ chills  
☐ vomiting ☐ diarrhea ☐ muscle pain ☐ joint pain  
☐ swollen lymph nodes ☐ others, such as \_\_\_\_\_

**3. In response to above mentioned side-effects, I took the following medication**

- ☐ NSAID (i.e. Ibuprofen)  
☐ Paracetamol  
☐ Metamizol (i.e. Novalgin)  
☐ Aspirin  
☐ others, such as \_\_\_\_\_

**1. Side effects after 2nd vaccination:**

- ☐ yes ☐ no

**2. If yes, please mark the appropriate side effects you had:**

- ☐ local events (such as pain at injection site, redness, swelling)  
☐ fever ☐ fatigue ☐ headache ☐ chills  
☐ vomiting ☐ diarrhea ☐ muscle pain ☐ joint pain  
☐ swollen lymph nodes ☐ others, such as \_\_\_\_\_

**3. In response to above mentioned side-effects, I took the following medication**

- ☐ NSAID (i.e. Ibuprofen)  
☐ Paracetamol  
☐ Metamizol (i.e. Novalgin)  
☐ Aspirin  
☐ others, such as \_\_\_\_\_
